# Supplementary material for: Predicting mortality with biomarkers: a population-based prospective cohort study for elderly Costa Ricans
Source: PubMed Central journal article supplement (PMC3507767; doi:10.1186/1478-7954-10-11), 2012-06-13
Supplement: 1478-7954-10-11-S2.pdf [file 1478-7954-10-11-S2.pdf]

## Additional File 2

### Pair wise correlation coefficients between biomarkers.

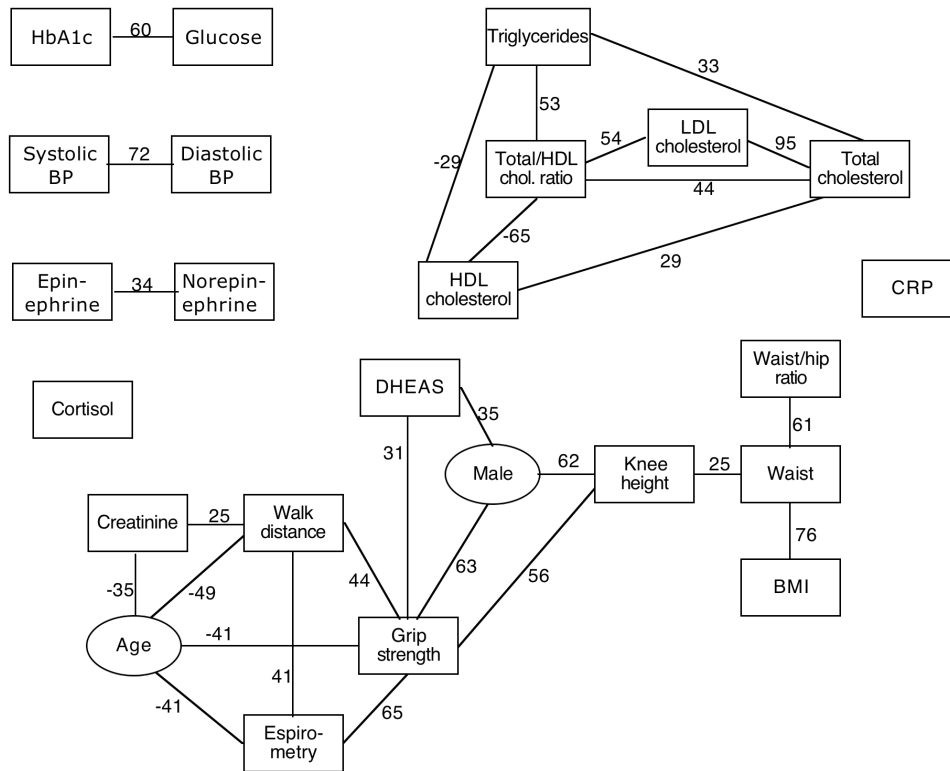

The numbers indicate correlation coefficients in percentages. Only 0.25 or higher coefficients shown.
